# Supplementary material for: Consumption, aggregate wealth and expected stock returns: a quantile cointegration approach
Source: publisher site journal article supplement (doi:10.1515/snde-2020-0059), 2021-09-13
Supplement: Supplementary file 1 [file Data_Quineche_2021.xlsx]

## Sheet: Sheet1
c	a	y
8.88083	10.9759	8.93291
8.89853	10.9726	8.93524
8.90924	10.9728	8.95029
8.91889	10.9693	8.98024
8.92758	10.9702	8.99284
8.93329	10.9763	9.00306
8.9318	10.9833	8.99467
8.92782	10.9959	8.98378
8.93133	11.0196	8.96909
8.93907	11.0274	8.96859
8.95351	11.0344	8.97185
8.96303	11.0524	8.99183
8.97039	11.0692	8.99646
8.97681	11.0744	9.01863
8.98123	11.0925	9.03384
8.99683	11.088	9.04467
9.00347	11.0848	9.0489
9.00449	11.0966	9.05665
9.00459	11.0908	9.05635
9.01032	11.1017	9.06816
9.01331	11.0881	9.06271
9.01579	11.0879	9.06422
9.02264	11.0906	9.06339
9.025	11.0998	9.05575
9.01651	11.1238	9.03313
9.02484	11.1354	9.03625
9.03611	11.1348	9.05941
9.04123	11.141	9.07168
9.04897	11.1375	9.06765
9.05584	11.1444	9.08098
9.06342	11.1414	9.07249
9.06987	11.139	9.07495
9.07018	11.1281	9.07435
9.0768	11.1455	9.07565
9.07082	11.1641	9.07162
9.07467	11.1709	9.06695
9.07962	11.1799	9.06963
9.08934	11.1996	9.08204
9.08674	11.1975	9.09151
9.09746	11.1477	9.10448
9.10437	11.1592	9.10462
9.11114	11.1984	9.11246
9.11588	11.2069	9.11355
9.12262	11.2158	9.11711
9.12568	11.2245	9.11883
9.12975	11.2148	9.12566
9.13984	11.2261	9.13177
9.14444	11.2385	9.14356
9.15645	11.2499	9.16437
9.1689	11.2602	9.18812
9.18257	11.2709	9.19934
9.18864	11.2619	9.20699
9.19781	11.2838	9.21667
9.21116	11.3067	9.22378
9.2224	11.2988	9.25105
9.24517	11.2995	9.26966
9.2522	11.2788	9.25663
9.26116	11.2992	9.26547
9.26605	11.3298	9.27959
9.26958	11.3361	9.2922
9.27803	11.3521	9.30381
9.28417	11.3621	9.31052
9.28835	11.3563	9.31729
9.29318	11.3857	9.32734
9.30753	11.391	9.34211
9.32024	11.4256	9.35902
9.33089	11.4187	9.36058
9.33604	11.4058	9.36777
9.34412	11.3969	9.36248
9.35164	11.3874	9.37124
9.35655	11.3809	9.39195
9.36591	11.3495	9.39831
9.3776	11.371	9.40666
9.38005	11.387	9.41977
9.3879	11.4156	9.42827
9.39093	11.4195	9.42248
9.39239	11.4212	9.43444
9.39582	11.4407	9.4497
9.40012	11.4641	9.45209
9.41146	11.4704	9.46042
9.42137	11.4864	9.45576
9.43671	11.5275	9.46507
9.44744	11.5182	9.47552
9.46415	11.505	9.51174
9.47245	11.5204	9.50101
9.47498	11.4908	9.50433
9.48251	11.4651	9.5034
9.4845	11.4318	9.50547
9.47947	11.3948	9.48697
9.48213	11.3941	9.48425
9.48316	11.4207	9.48415
9.48273	11.4478	9.48146
9.48669	11.4255	9.47977
9.49834	11.4354	9.53117
9.50364	11.4557	9.51218
9.51029	11.4741	9.51836
9.52283	11.4749	9.5228
9.53091	11.4828	9.52493
9.53906	11.4791	9.53094
9.54912	11.4864	9.535
9.55635	11.4891	9.52991
9.5582	11.4947	9.53812
9.56417	11.5002	9.55134
9.5732	11.5111	9.56128
9.58436	11.523	9.56035
9.59354	11.5244	9.56692
9.59899	11.5416	9.57265
9.6044	11.5445	9.5756
9.61245	11.5496	9.57973
9.61582	11.5539	9.56895
9.62147	11.5424	9.57321
9.62796	11.552	9.56994
9.62783	11.566	9.57293
9.61693	11.5706	9.56362
9.62077	11.5619	9.57364
9.63049	11.5695	9.57559
9.62956	11.5598	9.55957
9.63351	11.57	9.55695
9.63181	11.5674	9.56746
9.63364	11.5671	9.56685
9.63642	11.5682	9.56477
9.63895	11.5824	9.56685
9.64478	11.5998	9.57355
9.65779	11.6125	9.5751
9.66602	11.6095	9.57534
9.67652	11.6084	9.58274
9.69059	11.6142	9.59076
9.6982	11.6193	9.60628
9.7017	11.6337	9.60761
9.71232	11.6453	9.61747
9.72096	11.6599	9.62442
9.72858	11.6725	9.63373
9.74243	11.6757	9.6275
9.74996	11.6987	9.64992
9.76099	11.7215	9.64732
9.76739	11.7436	9.65509
9.77324	11.7466	9.66466
9.77591	11.772	9.67478
9.77923	11.7964	9.68026
9.78778	11.801	9.68434
9.79693	11.8117	9.69395
9.80449	11.7977	9.68225
9.80875	11.8152	9.69568
9.81482	11.825	9.70522
9.82777	11.8267	9.71009
9.83561	11.8397	9.72101
9.84642	11.8475	9.72385
9.85229	11.8522	9.72985
9.85854	11.8691	9.73372
9.86163	11.877	9.72825
9.86736	11.8662	9.73415
9.87557	11.8648	9.74201
9.87874	11.8411	9.74981
9.88703	11.8439	9.75667
9.89258	11.8614	9.75156
9.88728	11.8547	9.74248
9.88284	11.8562	9.74737
9.88835	11.8702	9.75384
9.88909	11.8647	9.75634
9.88949	11.8583	9.76588
9.90243	11.8627	9.78598
9.90628	11.8763	9.79298
9.91222	11.8804	9.79478
9.92047	11.8809	9.79948
9.92246	11.8884	9.79228
9.92557	11.8959	9.79504
9.93344	11.8955	9.79567
9.9368	11.8938	9.79935
9.9441	11.8965	9.79667
9.94901	11.8965	9.80391
9.95327	11.9094	9.80412
9.95757	11.9203	9.81329
9.96242	11.9352	9.82004
9.96967	11.9519	9.81866
9.97354	11.9639	9.82288
9.97751	11.9684	9.82145
9.98511	11.9705	9.8285
9.99163	11.9858	9.83349
9.99577	11.989	9.83722
10.0007	12.0253	9.83712
10.008	12.0519	9.84482
10.0129	12.0611	9.85056
10.0236	12.1053	9.85797
10.032	12.1172	9.86956
10.041	12.0929	9.88631
10.0525	12.1428	9.89594
10.0626	12.1483	9.90326
10.0686	12.1659	9.91127
10.0782	12.1549	9.92415
10.0866	12.2109	9.92448
10.095	12.2299	9.92985
10.1098	12.2162	9.94202
10.1189	12.225	9.95981
10.1318	12.2055	9.96523
10.1401	12.1914	9.97481
10.1479	12.2111	9.97422
10.1506	12.1842	9.9841
10.1538	12.2161	9.98093
10.1552	12.2263	10.0021
10.1582	12.2032	9.99276
10.163	12.1723	10.0157
10.1685	12.1924	10.0228
10.1722	12.189	10.0222
10.1791	12.2267	10.0248
10.1866	12.2373	10.0222
10.1918	12.2717	10.0356
10.2017	12.308	10.0511
10.2075	12.315	10.0506
10.2144	12.3307	10.0503
10.2211	12.3635	10.06
10.2297	12.371	10.0671
10.238	12.3883	10.0668
10.243	12.4027	10.0624
10.251	12.4177	10.067
10.2606	12.4398	10.0681
10.267	12.4307	10.0687
10.2737	12.437	10.084
10.2795	12.4584	10.0799
10.2838	12.4605	10.0814
10.2909	12.4591	10.0943
10.2955	12.4595	10.1084
10.2966	12.4367	10.1026
10.301	12.3953	10.1025
10.3031	12.3624	10.1036
10.3047	12.3158	10.1049
10.3074	12.2768	10.1389
10.3034	12.2588	10.1037
10.2996	12.2638	10.1143
10.2946	12.2797	10.1212
10.2901	12.2756	10.1421
10.2916	12.2868	10.1306
10.2911	12.275	10.1284
10.2937	12.3031	10.1283
10.2983	12.3215	10.141
10.3037	12.3273	10.1458
10.3065	12.3235	10.1449
10.3096	12.2892	10.1473
10.3121	12.3051	10.139
10.3144	12.3273	10.1374
10.3122	12.3228	10.1304
10.3175	12.3461	10.1405
10.3187	12.3525	10.1434
10.3179	12.3857	10.1407
10.3196	12.3992	10.1536
10.3216	12.4263	10.1242
10.3216	12.4502	10.129
10.3246	12.4622	10.1291
10.3325	12.477	10.1314
10.3351	12.4777	10.1417
10.3423	12.4985	10.1478
10.3514	12.523	10.1556
10.3613	12.5215	10.1687
10.3675	12.5049	10.1834
10.3732	12.5214	10.1877
10.3794	12.5294	10.1917
10.3826	12.5376	10.1967
10.3884	12.5543	10.2034
10.3947	12.5603	10.2013
10.3987	12.5756	10.2033
10.4043	12.589	10.207
10.4094	12.6041	10.212
10.4139	12.6212	10.2166
10.418	12.62	10.2223
10.4271	12.6303	10.2263
10.4308	12.6441	10.2412
10.439	12.6032	10.2455
10.4469	12.6485	10.2508
10.4498	12.6578	10.2539
10.452	12.6574	10.2731
10.4608	12.6626	10.2741
10.4664	12.6693	10.2809
